# Supplementary material for: Stretching of collapsed polymers causes an enhanced dissipative response of PNIPAM brushes near their LCST
Source: Royal Society of Chemistry journal article supplement (doi:10.1039/c5sm01426c), 2015-01-01
Supplement: c5sm01426c1.pdf [file c5sm01426c1.pdf]

# **Stretching of Collapsed Polymers Causes an Enhanced Dissipative Response of PNIPAM Brushes near their LCST**

**Yunlong Yu,<sup>1</sup> Bernard D. Kieviet,<sup>1</sup> Fei Liu,<sup>2</sup> Igor Siretanu,<sup>2</sup> Edit**

**Kutnyánszky,<sup>1</sup> G. Julius Vancso,<sup>1</sup> and Sissi de Beer<sup>1\*</sup>**

*1, Materials Science and Technology of Polymers, MESA+ Institute of Nanotechnology,  
University of Twente, P.O. Box 217, 7500 AE Enschede, The Netherlands*

*2, Physics of Complex Fluids, MESA+ Institute of Nanotechnology, University of Twente, P.O.  
Box 217, 7500 AE Enschede, The Netherlands*

**E-mail: [s.j.a.debeer@utwente.nl](mailto:s.j.a.debeer@utwente.nl)**

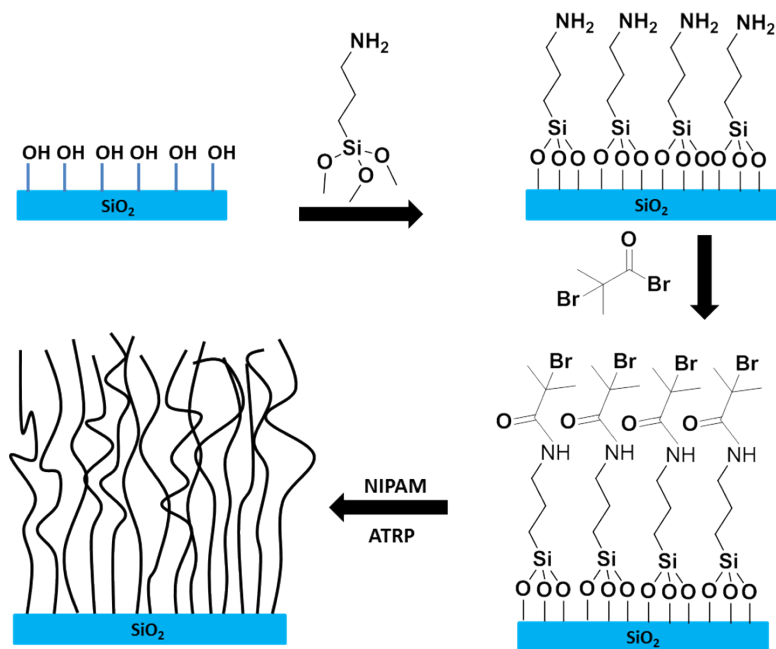

**Figure S1.** Schematic of synthesis of PNIPAM brush on silicon surface using three steps. Note that only one 2-bromo-2-methylpropionyl bromide molecule can react with each amino group.

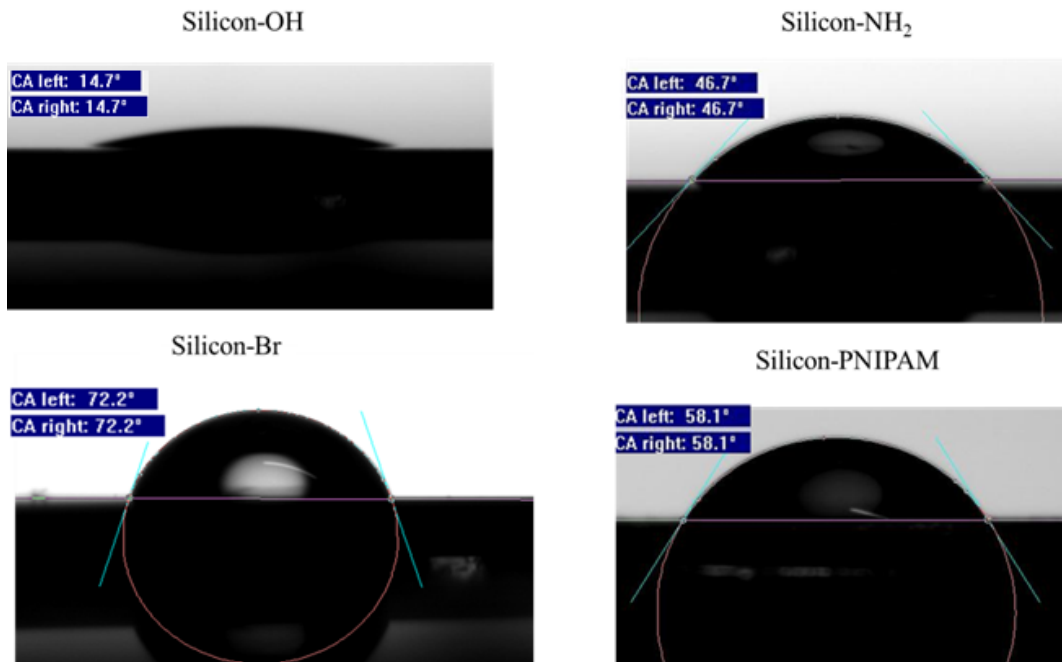

**Figure S2.** Static contact angle of silicon surfaces with various fabrication steps.

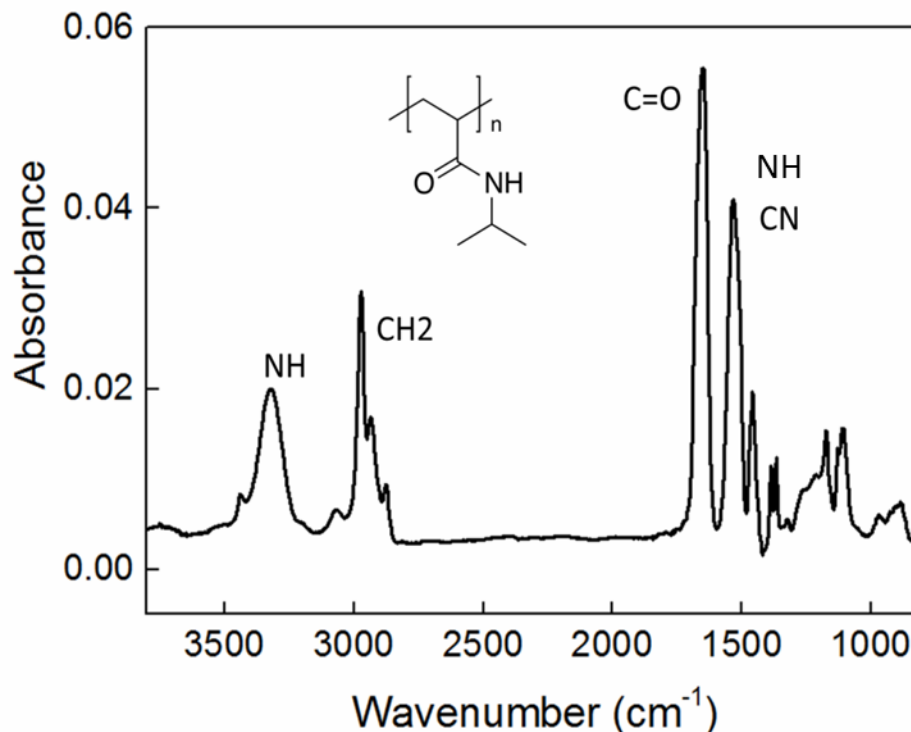

**Figure S3.** FTIR of PNIPAM brushes tethered on silicon surface.

FTIR wavenumbers ( $\text{cm}^{-1}$ ): 3289 (NH stretching vibration), 3078-2874 ( $\text{CH}_2$  stretching vibration), 1635 ( $\text{C}=\text{O}$  stretching vibration), 1535 (amide II), 1458-1386 (CH deformation vibration), 1366-1170 (CN stretching vibration). The characteristic groups of PNIPAM are  $\text{C}=\text{O}$  and  $-\text{CN}-$  appeared at 1635 and 1535  $\text{cm}^{-1}$  respectively, which shows there are PNIPAM brushes grafting on the silicon substrates.

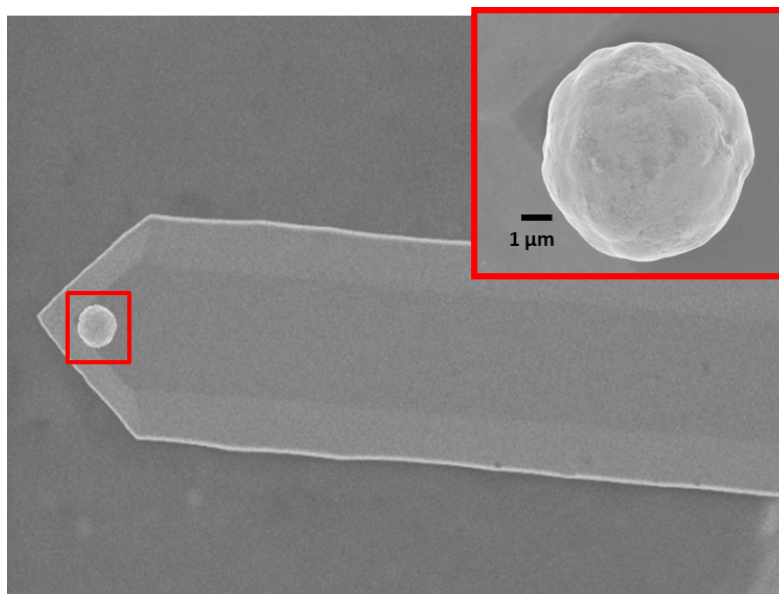

**Figure S4.** SEM image of typical gold colloid cantilever, the diameter is around 6  $\mu\text{m}$  (the scale bar is 1  $\mu\text{m}$ ).

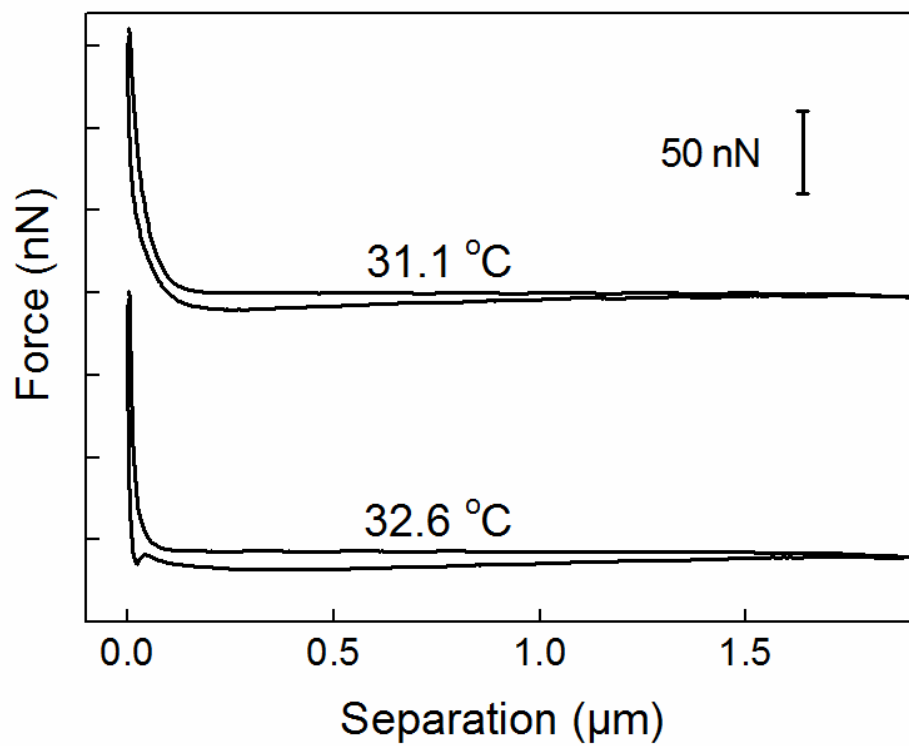

**Figure S5.** Typical force vs separation curves for  $T = 31.1\text{ }^\circ\text{C}$  (top curve) and  $T = 32.6\text{ }^\circ\text{C}$  (bottom curve).

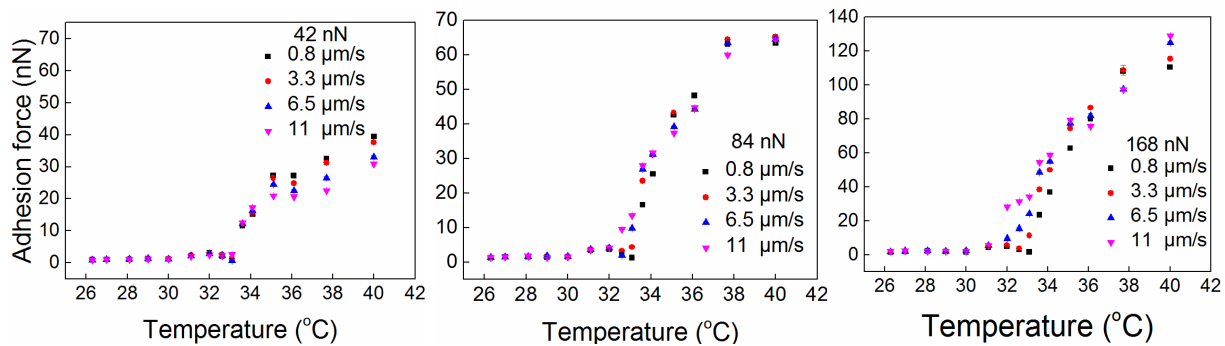

**Figure S6.** Adhesion force as a function of temperature at 4 various velocities (0.8 (square), 3.3 (circle), 6.5 (upward triangle) and 11 (downward triangle)) and 3 different normal loads of 42, 84, 168 nN.
